# Supplementary material for: Exploration of Prognostic Prediction Models for Renal Cell Carcinoma using Diffusion Relaxation Correlation Spectroscopic Imaging
Source: Research Square preprint supplement (doi:10.21203/rs.3.rs-7287776/v1), 2025-08-22
Supplement: Supplementary file 1 [file 25fa037c0941fc791ee23113.docx]

Supplementary Material 1: Propensity Score Matching (PSM)

The data collected in this retrospective study were not subjected to rigorous randomization. Instead, PSM was used to reduce the effects of confounding factors prior to model development. Specifically, PSM was performed on the basis of baseline data (including age, sex, maximum tumor diameter, pathological type and pathological grade) to obtain balanced samples using a 1:1 nearest-neighbor matching method between the 2 groups, including 24 patients with preoperative metastatic RCC and 103 with non-metastasic RCC who returned for postoperative follow-up. As a result, 48 RCC patients, consisting of 24 with metastatic RCC and 24 with non-metastasic RCC, were included in cohort 1.

Supplementary Material 2: Delineation of Regions

Regions of interest (ROIs) of the tumor region were manually delineated by two radiologists (with 5 and 16 years of experience in abdominal MRI) using ITK-SNAP (version 3.8.0; *http://www.itksnap.org/pmwiki/pmwiki.php*) software[23]. The radiologists were blinded to the patients’ clinical information and pathological results. The ROI was delineated on the slice containing the largest area of the solid part of the tumor among the three slices obtained with the DR-CSI sequence with a b-value of 1200 s/mm2 and a TE of 50 ms. Specifically, the ROI was placed within the solid portion while the T2WI and DCE images were accessed as references. The size of the tumor was measured along the longest dimension on the axial T2W images. All the ROIs were used in the subsequent processing steps for spectral estimation. Conventional ADC and T2 maps of all the ROIs were derived from the same DWI data using a simple monoexponential decay model. ADC values were calculated from all imaging sequences with TE of 50 ms, and the T2 values were calculated from all imaging sequences with b-value of 0 s/mm2.

Supplementary Material 3: Image Postprocessing and Quantification Strategy

DR-CSI is a 2-dimensional correlation-based MRI modality in which the diffusion and relaxation information of multiple tissue components is jointly encoded[12,22]. If we assume 2D imaging (without loss of generality) with spatial coordinates (x, y), then the ideal signal model used by DR-CSI is given by:


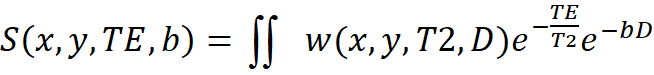
 (1)

where
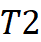
 represents the transverse relaxation time, D represents the diffusivity, and
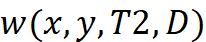
 is a 4D function comprising the full 2D diffusion-relaxation correlated spectra at each spatial location. The signal can then be expressed in a discrete formalization as follows:


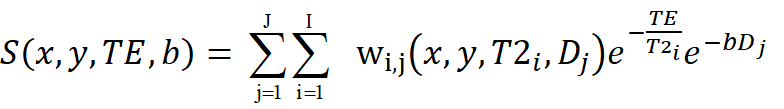
(2)

where I and J are the numbers of
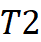
 and D values, respectively.
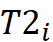
 represents the transverse relaxivity, and
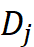
 represents the diffusivity.
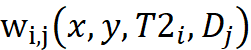
 is the discretized form of the 4D distribution function described above.

The distribution function was obtained via spectral estimation. Following the steps of a previous study, a consistent, nonnegative solution to the above equation was found with a spatial smoothness constraint.

Image processing and analysis was conducted using MATLAB software version R2022b (The MathWorks, Natick, MA, USA). Nonnegative and maximum entropy regularization were applied. The spectral subregions with ranges of 0.03~3.0 s/mm2/s and 5~200 ms were used for D and T2, respectively. For quantitative analysis, the DR-CSI spectra were processed and divided into equal subregions (2*2, 3*3, 4*4, 5*5, 6*6, 7*7, 8*8, and 9*9). The signal fraction maps of each equal subregion of each ROI were obtained through DR-CSI analysis.

| **Supplementary Table 1 Clinical characteristics of all the patients** | | | | | |
| --- | --- | --- | --- | --- | --- |
|  | n | Age(years) | Gender(Male/Female) | Tumor diameter (cm) | State(Metastasis/Non-metastasis ) |
| Pathological Subtype |  |  |  |  |  |
| ccRCC | 102 | 59.8±11.8 | 72(71)/30(29) | 5.5±2.2 | 27(26)/75(74) |
| Non-ccRCC | 25 | 48.7±15.5 | 9(36)/16(64) | 5.9±3.1 | 10(40)/15(60) |
| WHO/ISUP Grade |  |  |  |  |  |
| High-grade | 52 | 60.6±13.0 | 41(79)/11(21) | 6.5±2.4 | 26(50)/26(50) |
| Low-grade | 75 | 55.5±13.2 | 47(63)/28(37) | 4.9±2.2 | 11(15)/64(85) |
| Note: Data are presented as mean±standard deviation or number (percentage); ccRCC = clear cell renal cell carcinoma. | | | | | |

| **Supplementary Table 2 AUC values of equipartition models combined with different subregion selections and classifiers** | RFE | LR Lasso | 0.59 | 0.63 | 0.55 | 0.59 | 0.53 | 0.57 | 0.63 | 0.61 | Note: ANOVA = Analysis of variance; KW = Kruskal-Wallis; RFE = Recursive Feature Elimination; GP = gaussian process; SVM = support vector machine; LDA = linear discriminant analysis; LR Lasso = logistic regression via Lasso. |
| --- | --- | --- | --- | --- | --- | --- | --- | --- | --- | --- | --- |
| LDA | 0.59 | 0.71 | 0.73 | 0.59 | 0.72 | 0.70 | 0.71 | 0.69 |
| SVM | 0.50 | 0.69 | 0.63 | 0.57 | 0.59 | 0.57 | 0.71 | 0.67 |
| GP | 0.55 | 0.57 | 0.62 | 0.77 | 0.81 | 0.72 | 0.65 | 0.73 |
| Relief | LR Lasso | 0.57 | 0.67 | 0.59 | 0.55 | 0.54 | 0.63 | 0.57 | 0.69 |
| LDA | 0.57 | 0.71 | 0.67 | 0.57 | 0.63 | 0.69 | 0.62 | 0.67 |
| SVM | 0.52 | 0.71 | 0.63 | 0.57 | 0.59 | 0.67 | 0.69 | 0.63 |
| GP | 0.60 | 0.67 | 0.55 | 0.82 | 0.79 | 0.58 | 0.76 | 0.80 |
| KW | LR Lasso | 0.57 | 0.71 | 0.55 | 0.61 | 0.57 | 0.66 | 0.64 | 0.65 |
| LDA | 0.57 | 0.69 | 0.67 | 0.65 | 0.63 | 0.66 | 0.72 | 0.80 |
| SVM | 0.50 | 0.57 | 0.63 | 0.63 | 0.57 | 0.61 | 0.71 | 0.65 |
| GP | 0.60 | 0.69 | 0.81 | 0.64 | 0.87 | 0.65 | 0.70 | 0.85 |
| ANOVA | LR Lasso | 0.57 | 0.63 | 0.55 | 0.59 | 0.57 | 0.58 | 0.56 | 0.63 |
| LDA | 0.57 | 0.71 | 0.69 | 0.61 | 0.62 | 0.62 | 0.72 | 0.80 |
| SVM | 0.50 | 0.69 | 0.63 | 0.57 | 0.63 | 0.57 | 0.71 | 0.69 |
| GP | 0.60 | 0.57 | 0.65 | 0.76 | 0.85 | 0.72 | 0.68 | 0.70 |
|  |  | 2*2 | 3*3 | 4*4 | 5*5 | 6*6 | 7*7 | 8*8 | 9*9 |

| **Supplementary Table 3** **Clinical characteristics of the patients in cohort 2** | | |
| --- | --- | --- |
|  | Metastasis  (n=13) | Non-metastasis  (n=66) |
| Age(years) | 59.6±9.5 | 56.4±13.5 |
| Gender(Male/Female) | 8(62)/5(38) | 44(67)/22(33) |
| Tumor diameter (cm) | 7.1±2.7 | 4.3±1.7 |
| Pathological Subtype  (ccRCC/Non-ccRCC) | 10(77)/10(23) | 56(85)/10(15) |
| WHO/ISUP Grade  (High-/Low-grade) | 9(69)/4(31) | 8(12)/58(88) |
| Note: Data are presented as mean±standard deviation or number (percentage); ccRCC = clear cell renal cell carcinoma. | | |
